# Supplementary material for: Energy-entropy multiscale cell correlation method to predict toluene–water log P in the SAMPL9 challenge
Source: Royal Society of Chemistry journal article supplement (doi:10.1039/d3cp03076h), 2023-01-01
Supplement: d3cp03076h1.pdf [file d3cp03076h1.pdf]

## Supplementary Information

### **Energy-Entropy Method with Multiscale Cell Correlation to Predict Toluene-Water logP in the SAMPL9 Challenge.**

Hafiz Saqib Ali<sup>\*a</sup> and Richard H. Henchman<sup>\*b</sup>

<sup>a</sup> Chemistry Research Laboratory, Department of Chemistry and the INEOS Oxford Institute for Antimicrobial Research, University of Oxford, 12 Mansfield Road, Oxford, OX1 3TA, UK

<sup>b</sup> Sydney Medical School, Faculty of Medicine and Health, University of Sydney, Sydney, 2006 NSW, Australia

**Table S1.** Entropy Components ( $\text{J K}^{-1} \text{mol}^{-1}$ ) of Pure Water and of the Solute and Averaged Over All Solvent for Each Aqueous Solution

| Drug | Solute                  |                      |                   |                                   |                                |                               | Solvent                               |                                    |                                 |
|------|-------------------------|----------------------|-------------------|-----------------------------------|--------------------------------|-------------------------------|---------------------------------------|------------------------------------|---------------------------------|
|      | $S_M^{\text{transvib}}$ | $S_M^{\text{rovib}}$ | $S_M^{\text{or}}$ | $S_{\text{UA}}^{\text{transvib}}$ | $S_{\text{UA}}^{\text{rovib}}$ | $S_{\text{UA}}^{\text{conf}}$ | $S_{\text{wat,UA}}^{\text{transvib}}$ | $S_{\text{wat,UA}}^{\text{rovib}}$ | $S_{\text{wat,UA}}^{\text{or}}$ |
| -    | -                       | -                    | -                 | -                                 | -                              | -                             | 47.1                                  | 21.0                               | 10.0                            |
| 1    | 86.9                    | 82.6                 | 21.6              | 498.8                             | 174.1                          | 26.8                          | 47.5                                  | 21.4                               | 9.3                             |
| 2    | 87.1                    | 83.4                 | 19.5              | 519.7                             | 269.2                          | 44.0                          | 47.5                                  | 21.4                               | 9.5                             |
| 3    | 89.5                    | 85.5                 | 22.5              | 571.9                             | 258.2                          | 28.8                          | 47.6                                  | 21.4                               | 9.4                             |
| 4    | 89.8                    | 84.9                 | 19.0              | 656.7                             | 216.1                          | 35.7                          | 47.7                                  | 21.5                               | 9.4                             |
| 5    | 89.6                    | 85.8                 | 23.5              | 535.9                             | 213.0                          | 35.8                          | 47.6                                  | 21.3                               | 9.4                             |
| 6    | 81.9                    | 74.8                 | 21.2              | 341.3                             | 163.4                          | 17.1                          | 47.3                                  | 21.5                               | 9.9                             |
| 7    | 90.5                    | 87.4                 | 19.6              | 909.4                             | 283.1                          | 59.1                          | 47.5                                  | 21.3                               | 9.1                             |
| 8    | 88.9                    | 87.4                 | 15.9              | 1048.9                            | 319.1                          | 80.0                          | 47.4                                  | 21.3                               | 9.0                             |
| 9    | 89.1                    | 85.1                 | 23.0              | 571.4                             | 265.4                          | 38.0                          | 47.5                                  | 21.4                               | 9.2                             |
| 10   | 86.0                    | 80.9                 | 20.5              | 515.8                             | 169.2                          | 32.9                          | 47.6                                  | 21.4                               | 9.3                             |
| 11   | 87.3                    | 82.5                 | 21.3              | 446.5                             | 143.0                          | 17.8                          | 47.6                                  | 21.3                               | 9.1                             |
| 12   | 82.9                    | 75.4                 | 21.2              | 268.8                             | 114.1                          | 9.2                           | 47.5                                  | 21.4                               | 9.8                             |
| 13   | 86.1                    | 82.4                 | 19.6              | 497.5                             | 236.7                          | 28.8                          | 47.5                                  | 21.3                               | 9.5                             |
| 14   | 88.4                    | 86.0                 | 19.2              | 696.0                             | 271.4                          | 20.3                          | 47.6                                  | 21.4                               | 9.2                             |
| 15   | 85.2                    | 79.9                 | 21.3              | 542.1                             | 179.0                          | 25.6                          | 47.3                                  | 21.4                               | 9.4                             |
| 16   | 89.4                    | 87.8                 | 18.1              | 763.8                             | 238.4                          | 45.6                          | 47.4                                  | 21.3                               | 9.1                             |

**Table S2.** Entropy Components ( $\text{J K}^{-1} \text{mol}^{-1}$ ) of Pure Toluene and of the Solute and Averaged Over All Solvent for Each Toluene Solution

| Drug | Solute                  |                      |                   |                                   |                                |                               | Solvent                              |                                   |                                |                                       |                                    |
|------|-------------------------|----------------------|-------------------|-----------------------------------|--------------------------------|-------------------------------|--------------------------------------|-----------------------------------|--------------------------------|---------------------------------------|------------------------------------|
|      | $S_M^{\text{transvib}}$ | $S_M^{\text{rovib}}$ | $S_M^{\text{or}}$ | $S_{\text{UA}}^{\text{transvib}}$ | $S_{\text{UA}}^{\text{rovib}}$ | $S_{\text{UA}}^{\text{conf}}$ | $S_{\text{tol,M}}^{\text{transvib}}$ | $S_{\text{tol,M}}^{\text{rovib}}$ | $S_{\text{tol,M}}^{\text{or}}$ | $S_{\text{tol,UA}}^{\text{transvib}}$ | $S_{\text{tol,UA}}^{\text{rovib}}$ |
| -    | -                       | -                    | -                 | -                                 | -                              | -                             | 72.4                                 | 59.9                              | 23.8                           | 36.6                                  | 28.0                               |
| 1    | 91.3                    | 84.2                 | 26.2              | 500.9                             | 175.1                          | 24.5                          | 72.4                                 | 59.9                              | 23.6                           | 36.6                                  | 28.1                               |
| 2    | 90.5                    | 85.6                 | 25.7              | 522.6                             | 269.2                          | 41.1                          | 72.4                                 | 59.9                              | 24.1                           | 36.6                                  | 28.0                               |
| 3    | 91.1                    | 86.7                 | 28.1              | 572.6                             | 258.3                          | 30.4                          | 72.4                                 | 59.9                              | 24.5                           | 36.6                                  | 28.0                               |
| 4    | 91.7                    | 86.7                 | 26.7              | 657.4                             | 215.6                          | 36.0                          | 72.4                                 | 59.9                              | 24.0                           | 36.6                                  | 28.1                               |
| 5    | 91.6                    | 87.9                 | 27.6              | 536.3                             | 212.8                          | 36.1                          | 72.4                                 | 59.9                              | 24.4                           | 36.6                                  | 28.0                               |
| 6    | 90.4                    | 84.8                 | 27.2              | 339.9                             | 167.2                          | 17.8                          | 72.4                                 | 59.9                              | 24.2                           | 36.6                                  | 28.0                               |
| 7    | 93.1                    | 90.4                 | 25.4              | 908.1                             | 284.4                          | 70.4                          | 72.4                                 | 59.9                              | 23.8                           | 36.6                                  | 28.0                               |
| 8    | 92.3                    | 89.4                 | 23.8              | 1055.6                            | 319.3                          | 67.1                          | 72.4                                 | 59.9                              | 23.4                           | 36.6                                  | 28.0                               |
| 9    | 91.0                    | 86.6                 | 28.2              | 572.8                             | 263.9                          | 43.6                          | 72.4                                 | 59.9                              | 24.5                           | 36.6                                  | 28.0                               |
| 10   | 91.2                    | 86.2                 | 25.7              | 517.1                             | 170.8                          | 33.7                          | 72.4                                 | 59.9                              | 24.3                           | 36.6                                  | 28.0                               |
| 11   | 91.6                    | 84.9                 | 24.4              | 451.6                             | 141.7                          | 15.2                          | 72.4                                 | 59.9                              | 24.1                           | 36.6                                  | 28.0                               |
| 12   | 88.8                    | 81.0                 | 28.3              | 270.3                             | 114.8                          | 9.3                           | 72.4                                 | 59.9                              | 24.5                           | 36.6                                  | 28.0                               |
| 13   | 89.9                    | 85.1                 | 25.2              | 499.6                             | 237.7                          | 27.3                          | 72.4                                 | 59.9                              | 24.1                           | 36.6                                  | 28.0                               |
| 14   | 92.1                    | 88.1                 | 25.6              | 694.0                             | 274.1                          | 25.5                          | 72.4                                 | 59.9                              | 24.3                           | 36.6                                  | 28.0                               |
| 15   | 91.1                    | 84.6                 | 28.5              | 549.2                             | 180.8                          | 24.9                          | 72.4                                 | 59.9                              | 24.6                           | 36.6                                  | 28.0                               |
| 16   | 92.3                    | 88.5                 | 24.4              | 763.2                             | 239.7                          | 57.4                          | 72.4                                 | 59.9                              | 23.3                           | 36.6                                  | 28.0                               |

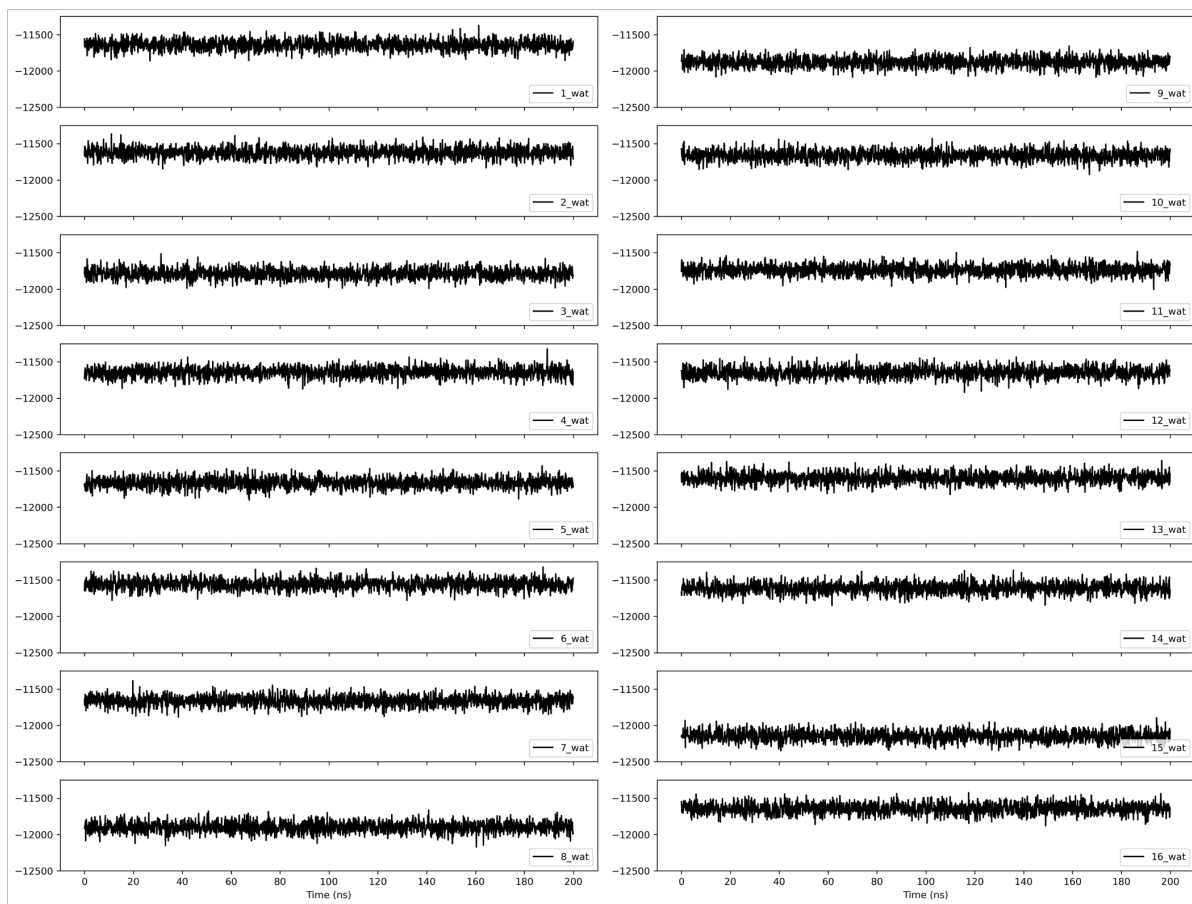

**Figure S1.** Energy versus simulation time for the 16 drug molecules in water.

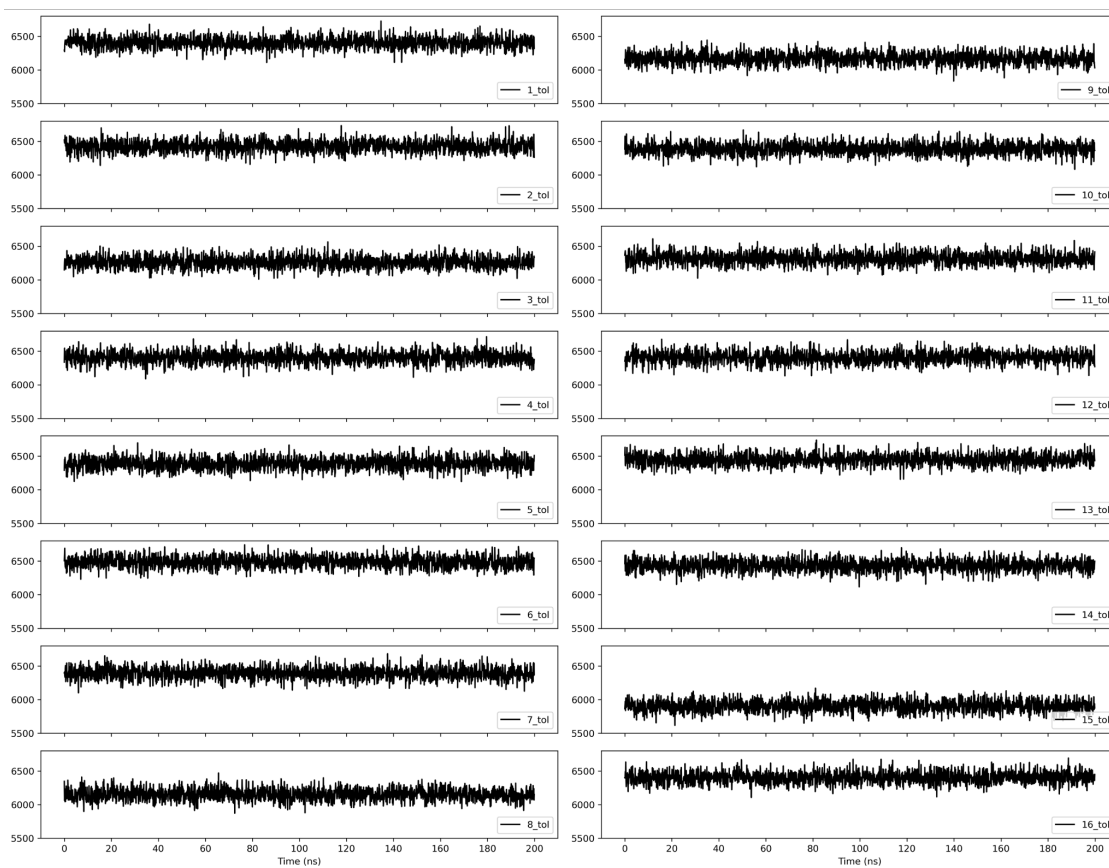

**Figure S2.** Energy versus simulation time for the 16 drug molecules in toluene.

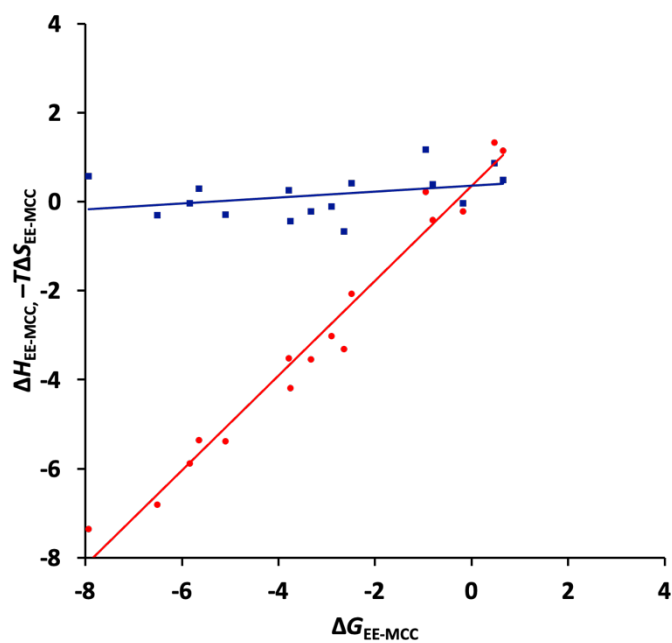

**Fig. S3.**  $\Delta G_{EE-MCC}$  versus  $\Delta H_{EE-MCC}$  (red) and  $\Delta G_{EE-MCC}$  versus  $-T\Delta S_{EE-MCC}$  (blue) for the transfer of the 16 drug molecules from water to toluene, including the corresponding lines of best fit.

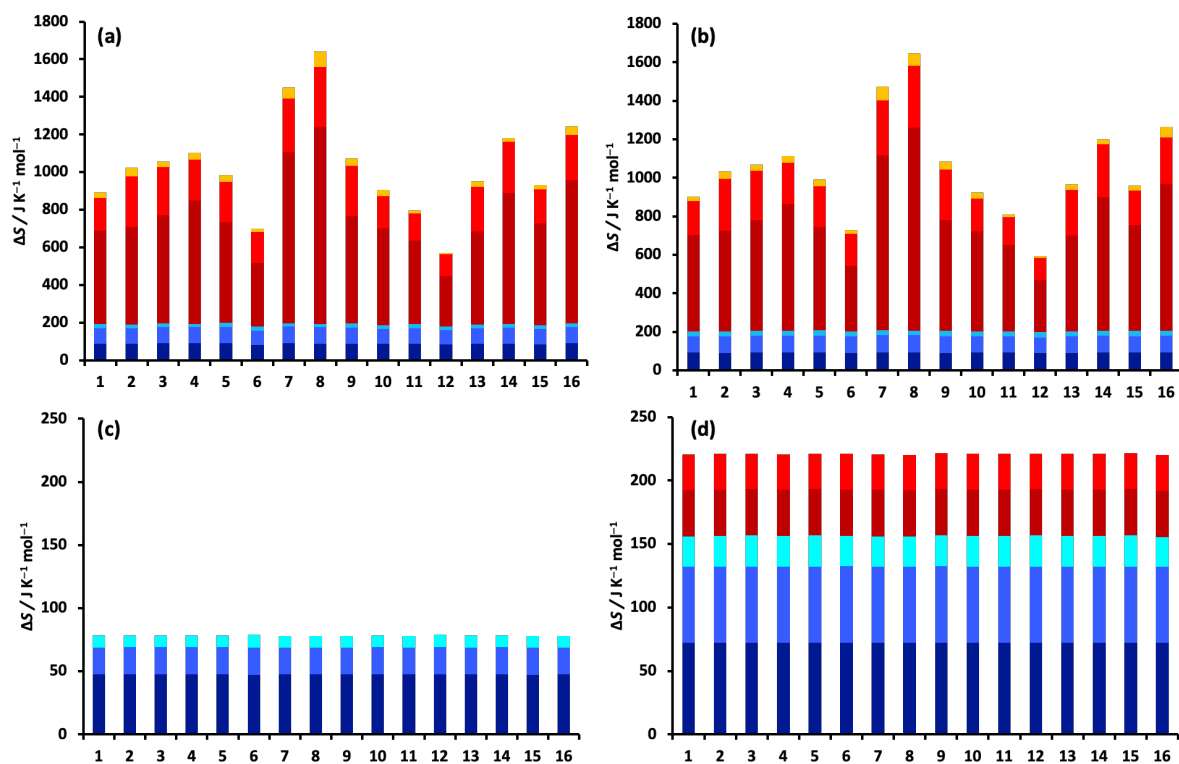

**Fig. S4.** MCC entropy components for the (a) drugs solvated in water, (b) drugs solvated in toluene, (c) pure water and (d) pure toluene. The colour scheme is as in **Fig. 3**.
